# Supplementary material for: Preparation and polymorph-sensitive luminescence properties of BiPO4:Eu, Part I: room-temperature reaction followed by a heat treatment
Source: Royal Society of Chemistry journal article supplement (doi:10.1039/c1ce05629h), 2011-01-01
Supplement: c1ce05629h.pdf [file c1ce05629h.pdf]

## Supporting Information

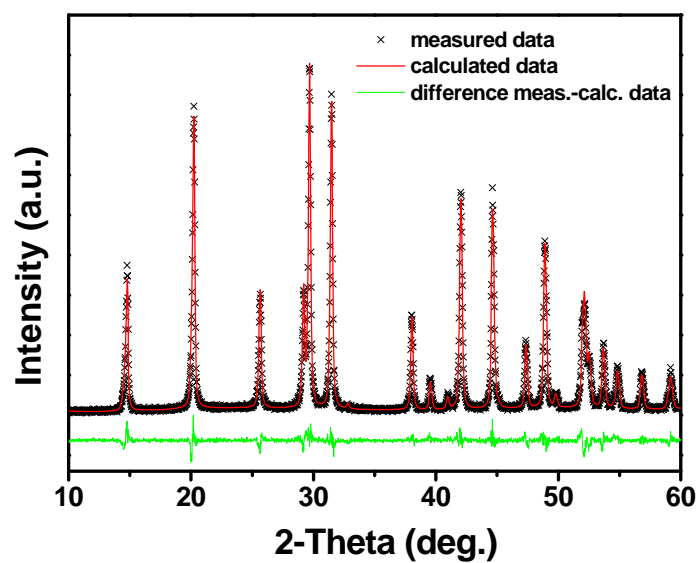

**Fig. S1** Rietveld fitting on powder X-ray diffraction data of the as-prepared HP sample ( $R_{wp}=0.1096$ ,  $R_p=0.0789$ ,  $R_{blnk}=0.0653$ , and  $\chi^2=1.657$ ).

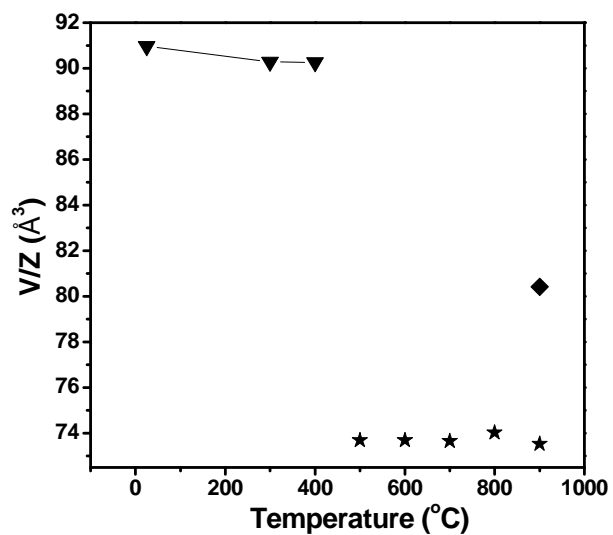

**Fig. S2** Unit cell volume dependence of  $\text{BiPO}_4$  polymorphs on calcination temperature.

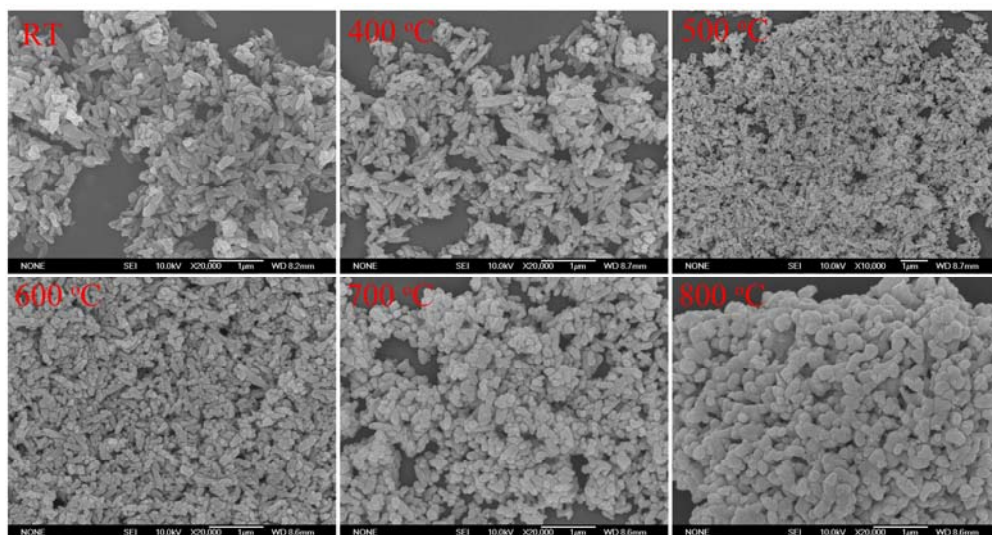

**Fig. S3** SEM images of HP and those obtained after calcinations over HP at given temperatures.

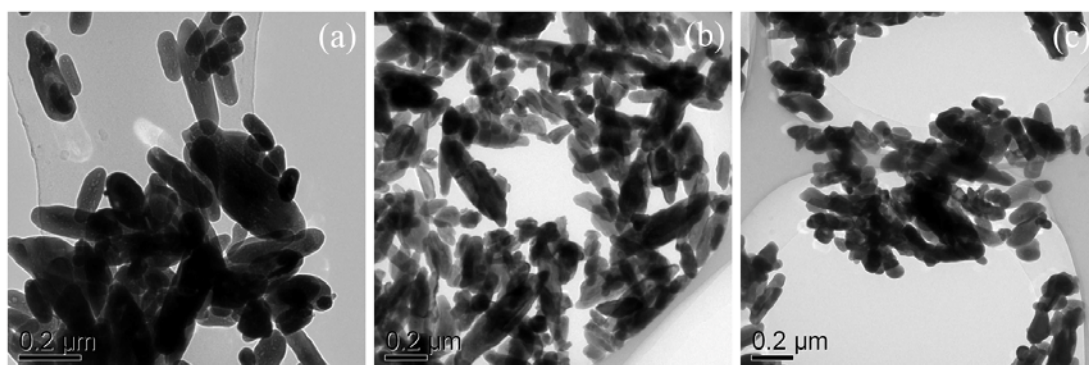

**Fig. S4** TEM images of (a) as-prepared HP and those obtained after calcinations over HP (b) at 400 °C and (c) at 600 °C.

**Table S1** Lattice parameters and atomic positions for HP (RT), LTMP (600 °C), and HTMP (900 °C) obtained by Rietveld refinement using GSAS program.

| Sample | Lattice parameters         | Atom | Site | x     | y      | z     |                           |
|--------|----------------------------|------|------|-------|--------|-------|---------------------------|
| HP     | P3 <sub>1</sub> 21(152)    | Bi   | 3b   | 0.469 | 0      | 0.833 | R <sub>wp</sub> =0.1036   |
|        | a=6.9597(2) Å              | Eu   | 3b   | 0.468 | 0      | 0.833 | R <sub>p</sub> =0.0734    |
|        | c=6.4551(2) Å              | P    | 3a   | 0.434 | 0      | 0.333 | R <sub>blnk</sub> =0.0606 |
|        | V=270.78(2) Å <sup>3</sup> | O1   | 6c   | 0.334 | 0.118  | 0.451 | χ <sup>2</sup> =1.482     |
|        |                            | O2   | 6c   | 0.628 | 0.114  | 0.185 |                           |
|        |                            |      |      |       |        |       |                           |
| LTMP   | P2 <sub>1</sub> /n(14)     | Bi   | 4e   | 0.286 | 0.144  | 0.086 | R <sub>wp</sub> =0.1120   |
|        | a=6.7533(3) Å              | Eu   | 4e   | 0.277 | 0.155  | 0.078 | R <sub>p</sub> =0.0848    |
|        | b=6.9404(3) Å              | P    | 4e   | 0.304 | 0.155  | 0.619 | R <sub>blnk</sub> =0.0767 |
|        | c=6.4728(3) Å              | O1   | 4e   | 0.240 | -0.002 | 0.459 | χ <sup>2</sup> =1.691     |
|        | β=103.717                  | O2   | 4e   | 0.380 | 0.304  | 0.514 |                           |
|        | V=294.73(3) Å <sup>3</sup> | O3   | 4e   | 0.475 | 0.125  | 0.806 |                           |
|        |                            | O4   | 4e   | 0.123 | 0.190  | 0.699 |                           |
| HTMP   | P2 <sub>1</sub> /m(11)     | Bi   | 2e   | 0.143 | 0.250  | 0.168 | R <sub>wp</sub> =0.1082   |
|        | a=4.8531(3) Å              | Eu   | 2e   | 0.111 | 0.250  | 0.169 | R <sub>p</sub> =0.0793    |
|        | b=7.0556(4) Å              | P    | 2e   | 0.378 | 0.750  | 0.309 | R <sub>blnk</sub> =0.0702 |
|        | c=4.6881(3) Å              | O1   | 2e   | 0.669 | 0.750  | 0.254 | χ <sup>2</sup> =1.453     |
|        | β=96.199                   | O2   | 2e   | 0.627 | 0.250  | 0.169 |                           |
|        | V=159.59(2) Å <sup>3</sup> | O3   | 4f   | 0.214 | 0.577  | 0.177 |                           |

**Table S2** Bond lengths for HP, LTMP (600 °C), and HTMP (900 °C) polymorphs obtained by Rietveld refinement using GSAS program.

| HP      |              | LTMP  |              | HTMP    |              |
|---------|--------------|-------|--------------|---------|--------------|
| bond    | distance (Å) | bond  | distance (Å) | bond    | distance (Å) |
| Bi-O1×2 | 2.906        | Bi-O3 | 2.458        | Bi-O1   | 2.767        |
| Bi-O2×2 | 2.534        | Bi-O4 | 2.510        | Bi-O2   | 2.429        |
| Bi-O1×2 | 2.508        | Bi-O1 | 2.479        | Bi-O3×2 | 2.332        |
| Bi-O1×2 | 2.476        | Bi-O1 | 2.700        | Bi-O3×2 | 2.547        |
|         |              | Bi-O4 | 2.504        | Bi-O1   | 2.266        |
|         |              | Bi-O2 | 2.406        | Bi-O2   | 2.759        |
|         |              | Bi-O2 | 2.667        |         |              |
|         |              | Bi-O3 | 2.359        |         |              |
| P-O1×2  | 1.522        | P-O2  | 1.583        | P-O1    | 1.549        |
| P-O2×2  | 1.518        | P-O3  | 1.477        | P-O3×2  | 1.540        |
|         |              | P-O4  | 1.450        | P-O2    | 1.530        |
|         |              | P-O1  | 1.495        |         |              |
